# Supplementary material for: Phospholipase D1 promotes cervical cancer progression by activating the RAS pathway
Source: PubMed Central journal article supplement (PMC9344829; doi:10.1111/jcmm.17439), 2022-06-30
Supplement: JCMM-26-4244-s001.pdf [file JCMM-26-4244-s001.pdf]

Table S1 The main materials used in this work.

| <b>Materials</b>                      | <b>Supplier</b>                                                                                                  |
|---------------------------------------|------------------------------------------------------------------------------------------------------------------|
| Human cervical cancer cell line CASKI | Institute of Basic Medicine, Chinese Academy of Medical Sciences & Basic College of Peking Union Medical College |
| <b>Cell culture</b>                   |                                                                                                                  |
| RPMI-1640                             | Corning Inc, USA                                                                                                 |
| Fetal bovine serum (FBS)              |                                                                                                                  |
| Trypsin-EDTA                          | Sigma-Aldrich Inc, Germany                                                                                       |
| Penicillin streptomycin               |                                                                                                                  |
| <b>CRISPR/Cas9 editing system</b>     |                                                                                                                  |
| FuGENE® HD                            | Promega, USA                                                                                                     |
| Primer (R&F)                          | Shanghai Genechem, China                                                                                         |
| Oligo primers                         | Shanghai Generay Biotech, China                                                                                  |
| TOP10 competent cells                 | Shanghai Genechem, China                                                                                         |
| 2×Taq Plus Master Mix                 | Vazyme, China                                                                                                    |
| BsmBI                                 | Thermo Fisher, USA                                                                                               |
| T4 DNA Ligase                         | TIANGEN BIOTECH, China                                                                                           |
| TIANGel Midi Purification Kit         |                                                                                                                  |
| EndoFree Mini Plasmid Kit II          |                                                                                                                  |
| Tryptone                              | OXOID, USA                                                                                                       |
| Yeast Extract                         |                                                                                                                  |
| Agar Powder                           |                                                                                                                  |
| Agarose                               | Sigma-Aldrich Inc, Germany                                                                                       |
| DL-Dithiothreitol(DTT)                | Sangon Biotech (Shanghai) Co.,Ltd                                                                                |
| 250bp-II DNA ladder                   | Shanghai Generay Biotech Co.,Ltd                                                                                 |
