# Supplementary material for: Phospholipase D1 promotes cervical cancer progression by activating the RAS pathway
Source: PubMed Central journal article supplement (PMC9344829; doi:10.1111/jcmm.17439), 2022-06-30
Supplement: JCMM-26-4244-s002.pdf [file JCMM-26-4244-s002.pdf]

Table S3

1. The details of respective sgRNAs for PLD1

| sgRNA sequence         | location | Plasmid    | Resistance gene | Vectors                    |
|------------------------|----------|------------|-----------------|----------------------------|
| AGCGATCCCAAGATAACAAGA  | Exon5    | PCA02629-3 | puromycin       | LV-sgC<br>as9-P2<br>A-puro |
| AATATACAGACGTATCTCTC   | Exon5    | PCA02630-3 | puromycin       | LV-sgC<br>as9-P2<br>A-puro |
| CACGCGGGAAGTCCACTTTG   | Exon2    | PCA02631-3 | puromycin       | LV-sgC<br>as9-P2<br>A-puro |
| GAGAGATACGTCTGTATATT   | Exon4    | PCA02632-3 | puromycin       | LV-sgC<br>as9-P2<br>A-puro |
| TACTACTATTGAATTAACACA  | Exon3    | PCA02633-3 | puromycin       | LV-sgC<br>as9-P2<br>A-puro |
| GCATCCCCATTCCCCTACTAGA | Exon2    | PCA02634-3 | puromycin       | LV-sgC<br>as9-P2<br>A-puro |

2. Primers for respective plasmids

| Primer  | Sequence (5' to 3')     | plasmid                                   |
|---------|-------------------------|-------------------------------------------|
| PLD1 F1 | TGAAAAACGAGCCACGGGTA    | pca02629, pca02630,<br>pca02631, pca02632 |
| PLD1 R1 | ACGCTCTGACCCTTGTTGTAG   |                                           |
| PLD1 F2 | GGAGGAACAGCGTTTGTAGGA   | pca02633, pca02634                        |
| PLD1 R2 | TCCATTCAACTTGTATACTGGCA |                                           |

3. PLD1 primer sequence for PLD1 overexpression

|                     |                                    |
|---------------------|------------------------------------|
| PLD1 forward primer | <b>5'-CCCAGCGATCCCAAGATACAA-3'</b> |
| PLD1 reverse primer | <b>5'-GACAGCCGGAGAGATACGTCT-3'</b> |
