# Supplementary material for: Phospholipase D1 promotes cervical cancer progression by activating the RAS pathway
Source: PubMed Central journal article supplement (PMC9344829; doi:10.1111/jcmm.17439), 2022-06-30
Supplement: JCMM-26-4244-s003.pdf [file JCMM-26-4244-s003.pdf]

Table S2 Details of primary and secondary antibodies used for western blotting or immunocytochemistry staining.

| <b>Antibodies</b>                         | <b>Catalog No</b> | <b>Supplier</b>                      |
|-------------------------------------------|-------------------|--------------------------------------|
| Rabbit anti-human HRAS                    | ab201054          | ABCAM, Inc                           |
| Rabbit anti-human PLD 1                   | ab50695           |                                      |
| Mouse anti-human GAPDH                    | ab8245            |                                      |
| Rabbit anti-human p-ERK1/2(Thr202/Tyr204) | #4370             | Cell Signaling<br>Technology,<br>Inc |
| Rabbit anti-human E-cadherin              | #3195C            |                                      |
| Rabbit anti-human Vimentin                | #5741             |                                      |
